# Supplementary material for: Two-dimensional functionalized MBene Mg2B3T (T = O, H, and F) monolayers as anode materials for high-performance K-ion batteries
Source: Royal Society of Chemistry journal article supplement (doi:10.1039/d4cp02402h), 2024-01-01
Supplement: d4cp02402h1.pdf [file d4cp02402h1.pdf]

*Supporting Information for*

**The Two-Dimensional Functionalized MBenes  $Mg_2B_3T$  (T=O,  
H, and F) Monolayers as Anode Material for High-  
Performance K-ion Batteries**

Fengzhang Tang,<sup>a</sup> Jiafei Pang,<sup>a</sup> Jinni Yang,<sup>b</sup> Xiaoyu Kuang<sup>a\*</sup> and Aijie Mao<sup>a\*</sup>

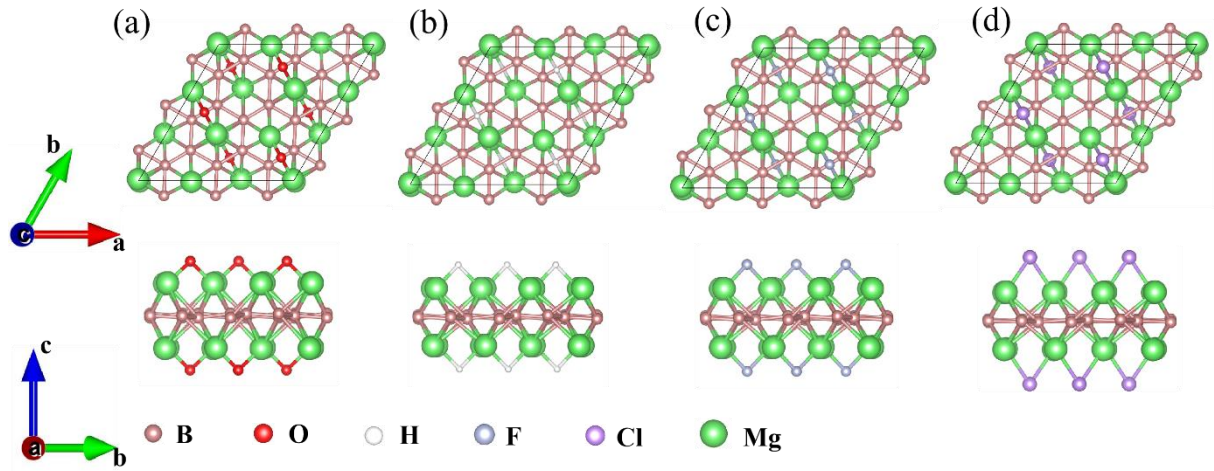

Fig. S1 Top and side view of  $\text{Mg}_2\text{B}_3\text{T}$  ( $\text{T} = \text{O}, \text{H}, \text{F}, \text{Cl}$ ) monolayer. Here, (a)  $\text{Mg}_2\text{B}_3\text{O}$ , (b)  $\text{Mg}_2\text{B}_3\text{H}$ , (c)  $\text{Mg}_2\text{B}_3\text{F}$ , and (d)  $\text{Mg}_2\text{B}_3\text{Cl}$ ; The B and Mg atoms are labeled pink and green balls, while the O, H, F and Cl atoms are labeled by red, white, light blue and purple respectively.

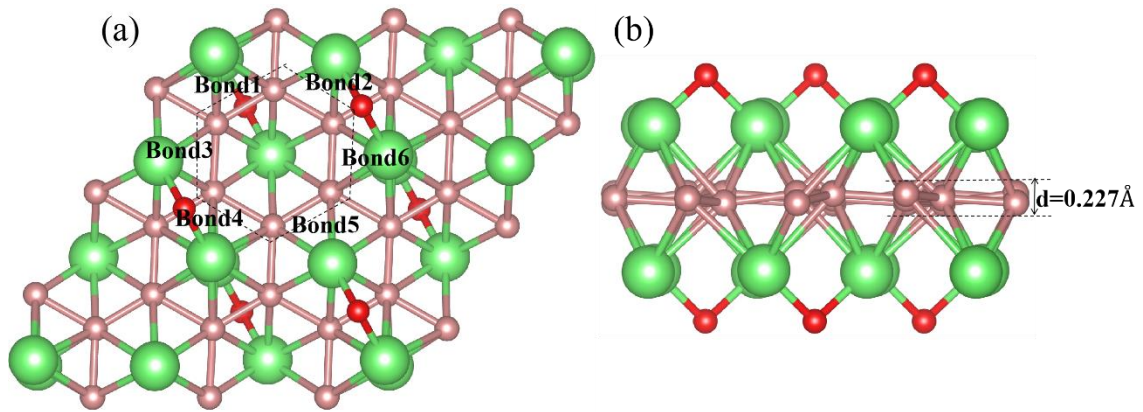

Fig. S2 (a) Six B-B bonds of the boron ring in the  $\text{Mg}_2\text{B}_3\text{O}$  monolayer, and (b) fold height diagram of the intermediate boron layer.

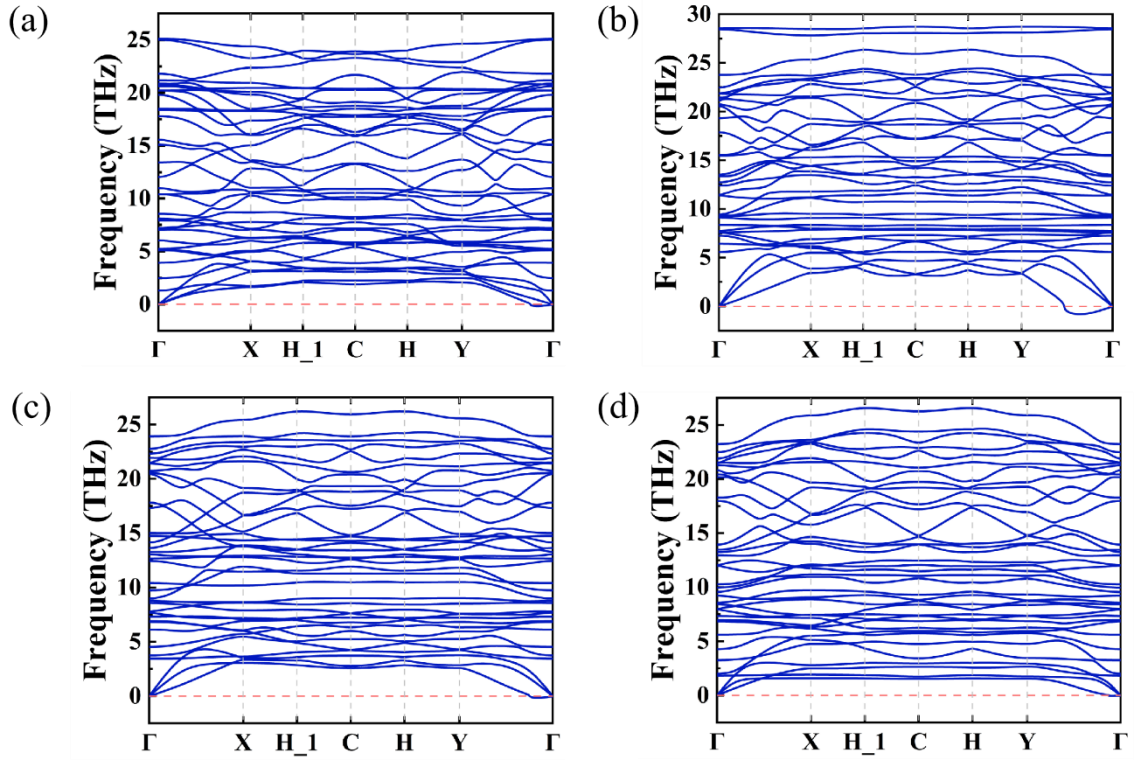

Fig. S3 The phonon dispersions curves for the (a)  $\text{Mg}_2\text{B}_3\text{O}$  monolayer, (b)  $\text{Mg}_2\text{B}_3\text{H}$  monolayer, (c)  $\text{Mg}_2\text{B}_3\text{F}$  monolayer, and (d)  $\text{Mg}_2\text{B}_3\text{Cl}$  monolayer, respectively.

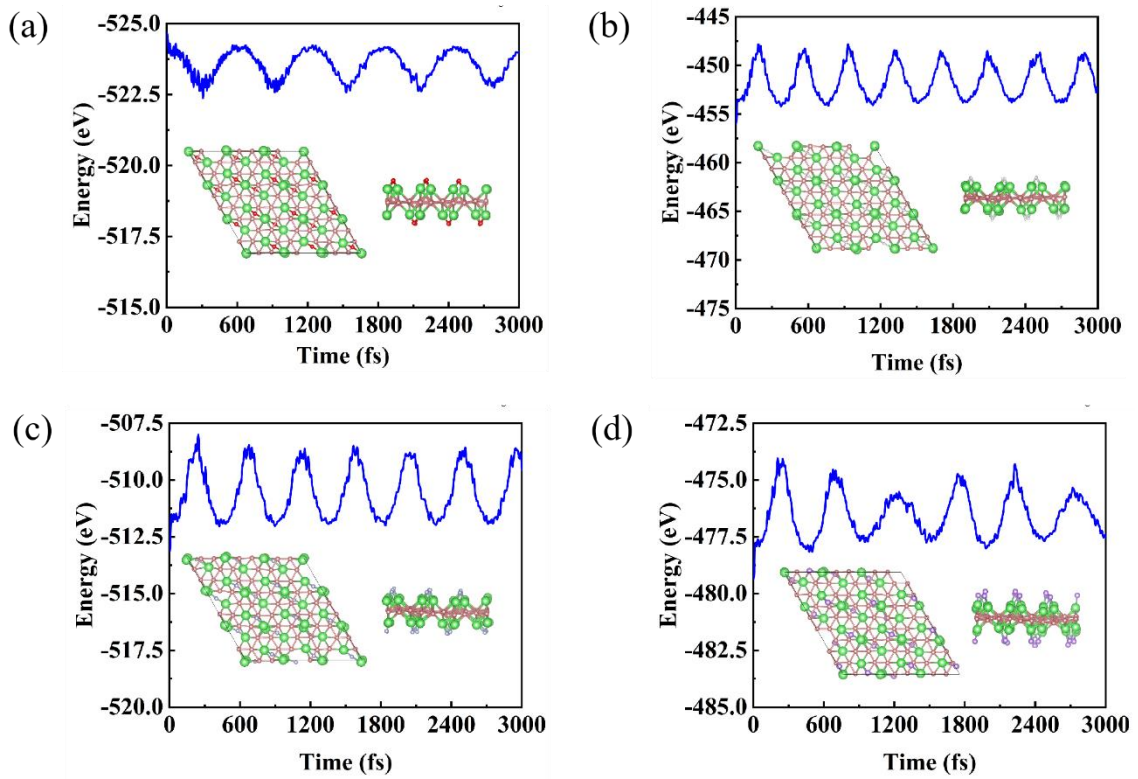

Fig. S4 Structural energy fluctuations and electron snapshots simulated by AIMD at 300K: (b)  $\text{Mg}_2\text{B}_3\text{H}$  monolayer, (c)  $\text{Mg}_2\text{B}_3\text{F}$  monolayer, and (d)  $\text{Mg}_2\text{B}_3\text{Cl}$  monolayer, respectively; while (a)  $\text{Mg}_2\text{B}_3\text{O}$  monolayer is thermodynamically stable at 100K.

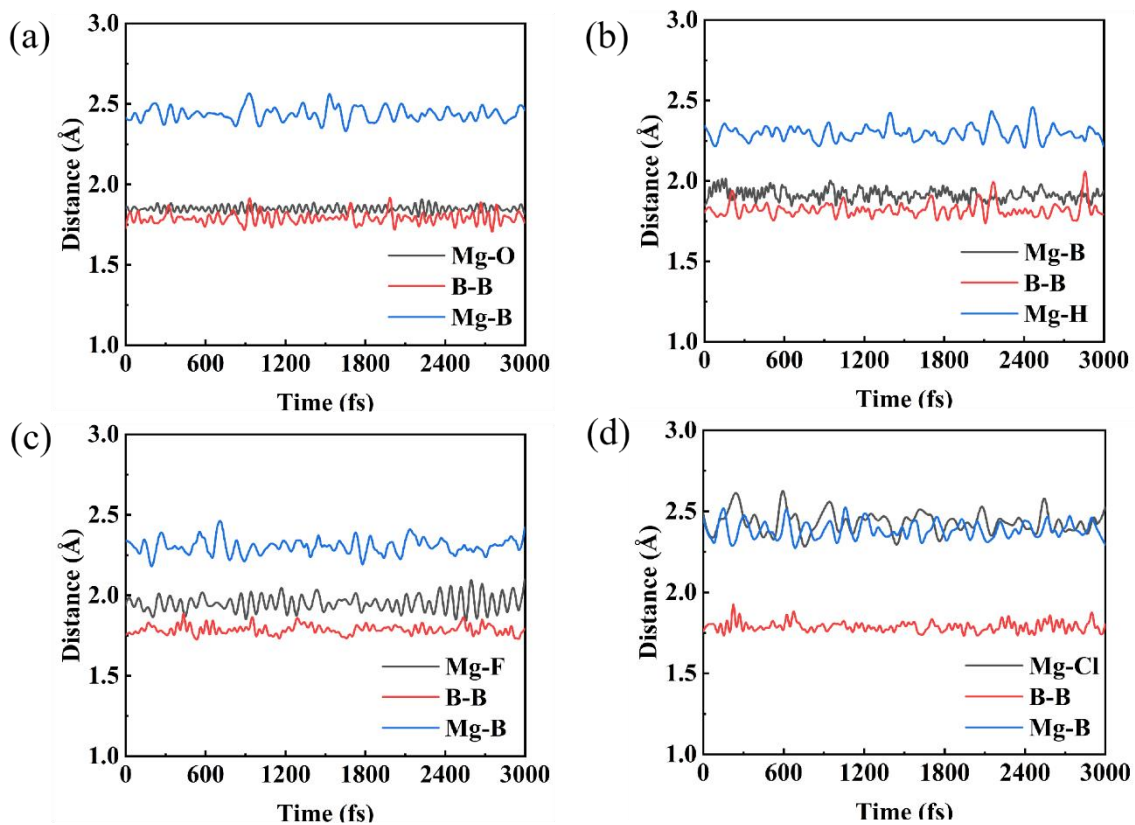

Fig. S5 Changes in bond lengths within the structures of (a)  $\text{Mg}_2\text{B}_3\text{O}$  monolayer, (b)  $\text{Mg}_2\text{B}_3\text{H}$  monolayer, (c)  $\text{Mg}_2\text{B}_3\text{F}$  monolayer, and (d)  $\text{Mg}_2\text{B}_3\text{Cl}$  monolayer during AIMD simulations.

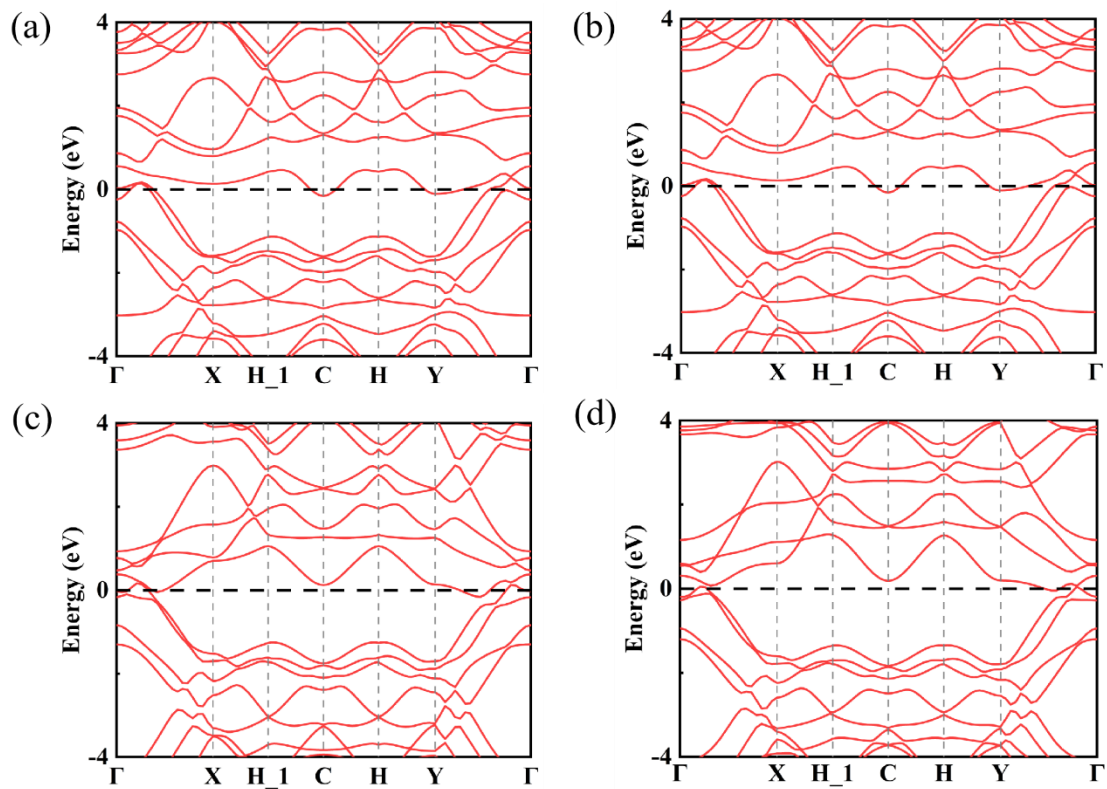

Fig. S6 The electronic band structures for the (a)  $\text{Mg}_2\text{B}_3\text{O}$  monolayer, (b)  $\text{Mg}_2\text{B}_3\text{H}$  monolayer, (c)  $\text{Mg}_2\text{B}_3\text{F}$  monolayer, and (d)  $\text{Mg}_2\text{B}_3\text{Cl}$  monolayer, respectively.

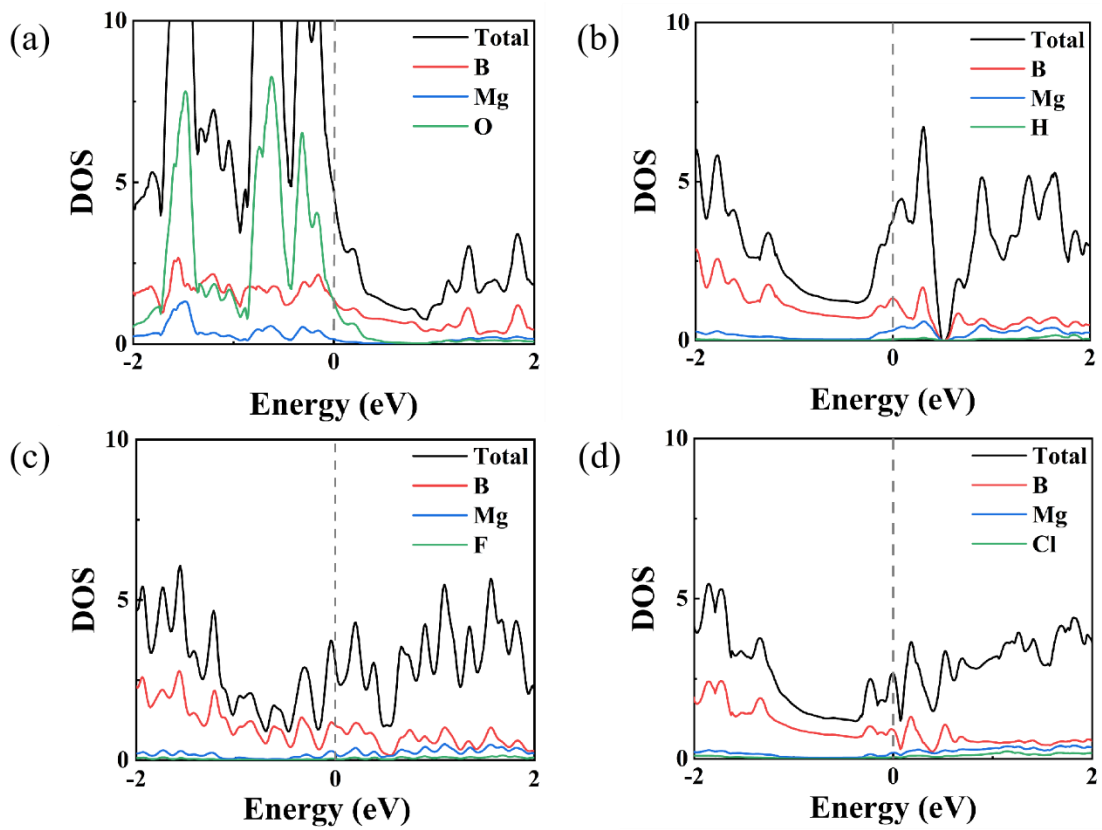

Fig. S7 The calculated partial density of states (DOS) for the (a)  $\text{Mg}_2\text{B}_3\text{O}$  monolayer, (b)  $\text{Mg}_2\text{B}_3\text{H}$  monolayer, (c)  $\text{Mg}_2\text{B}_3\text{F}$  monolayer, and (d)  $\text{Mg}_2\text{B}_3\text{Cl}$  monolayer, respectively.

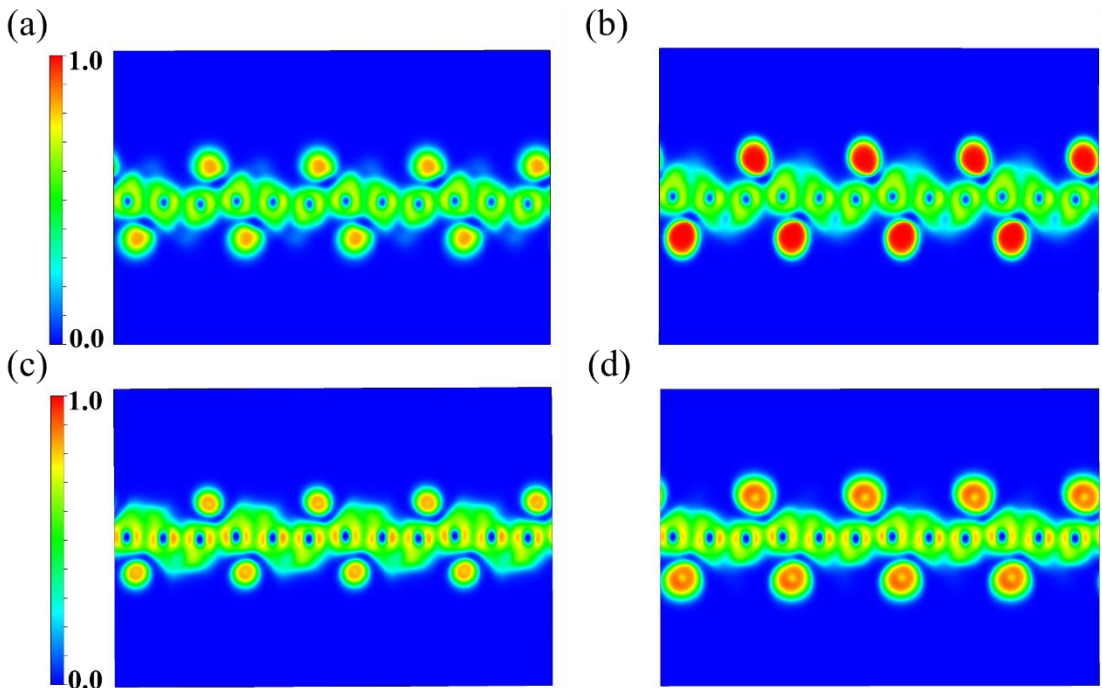

Fig. S8 The electron localization function (ELF) for the (a)  $\text{Mg}_2\text{B}_3\text{O}$  monolayer, (b)  $\text{Mg}_2\text{B}_3\text{H}$  monolayer, (c)  $\text{Mg}_2\text{B}_3\text{F}$  monolayer, and (d)  $\text{Mg}_2\text{B}_3\text{Cl}$  monolayer, respectively.

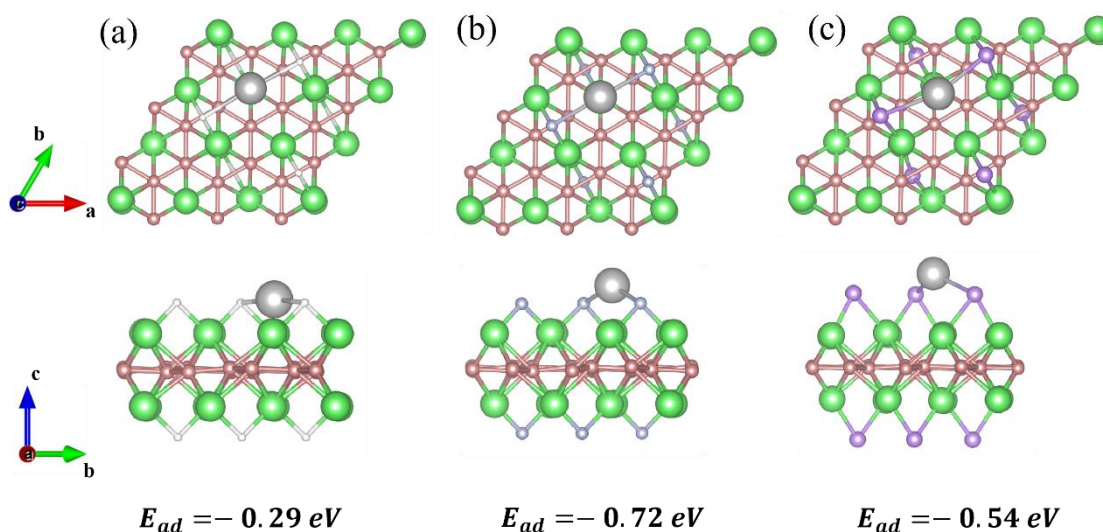

Fig. S9 The top view and side view of single K atom adsorbed on (a)  $\text{Mg}_2\text{B}_3\text{H}$  monolayer, (b)  $\text{Mg}_2\text{B}_3\text{F}$  monolayer, and (c)  $\text{Mg}_2\text{B}_3\text{Cl}$  monolayer structure and the corresponding adsorption energy. The silver ball represents the K atom.

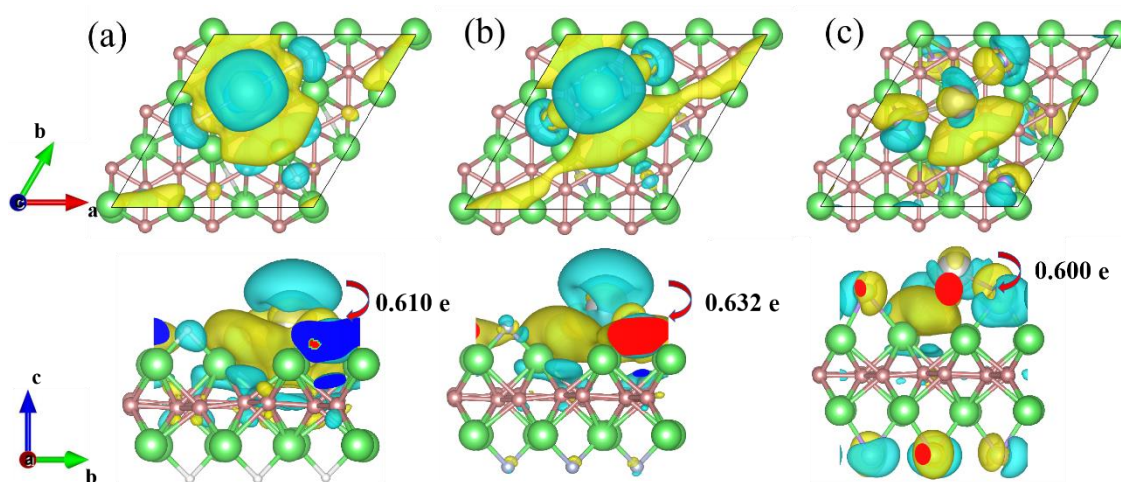

Fig. S10 Top view and side view of charge density difference diagram of K adsorption at the A4 site of (a)  $\text{Mg}_2\text{B}_3\text{H}$  monolayer, (b)  $\text{Mg}_2\text{B}_3\text{F}$  monolayer, and (c)  $\text{Mg}_2\text{B}_3\text{Cl}$  monolayer. The cyan region indicates a decrease in charge density and the yellow region indicates an increase in charge density.

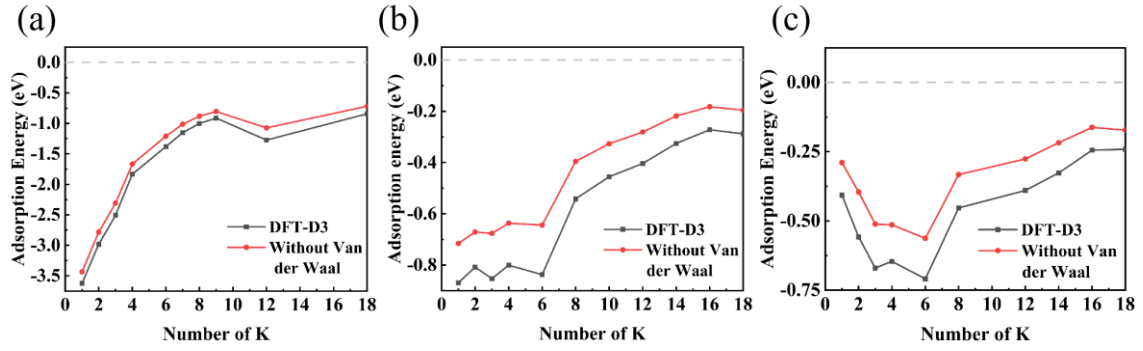

Fig. S11 The adsorption energies of (a)Mg<sub>2</sub>B<sub>3</sub>O, (b)Mg<sub>2</sub>B<sub>3</sub>F, and (c)Mg<sub>2</sub>B<sub>3</sub>H monolayer at different K adsorption concentrations, where the red line indicates the adsorption energies without considering van der Waals interactions, and the black line represents the adsorption energies with Grimme's DFT-D3 considered in VASP.



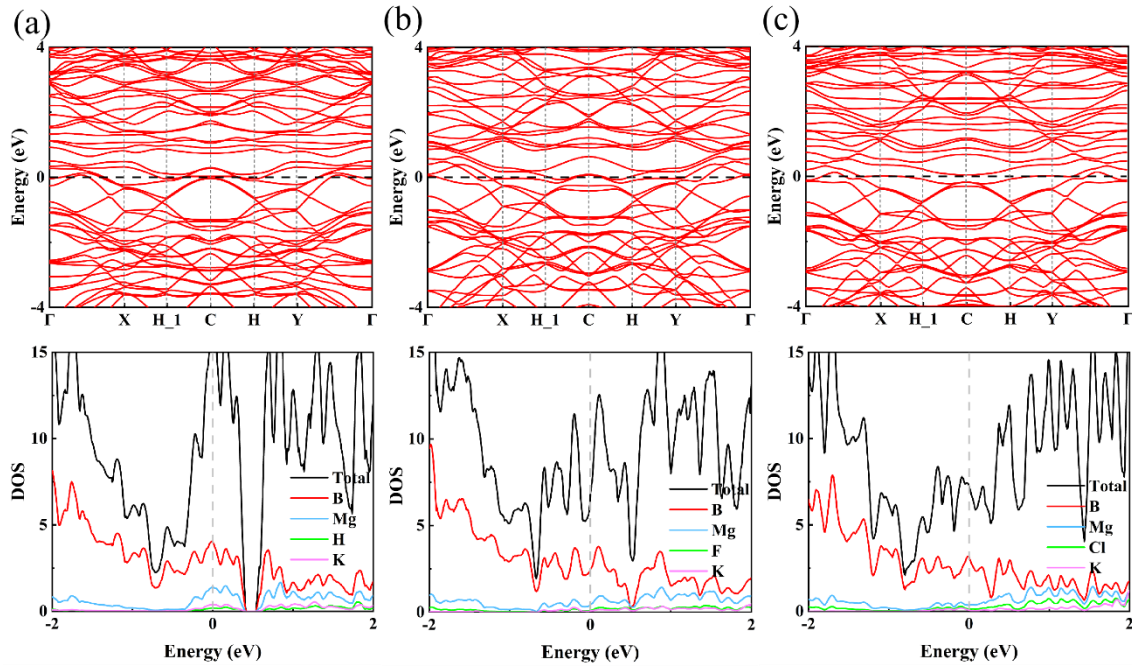

Fig. S12 Electronic band structure and partial density of states (DOS) of (a)  $\text{Mg}_2\text{B}_3\text{H}$  monolayer, (b)  $\text{Mg}_2\text{B}_3\text{F}$  monolayer, and (c)  $\text{Mg}_2\text{B}_3\text{Cl}$  monolayer, respectively.

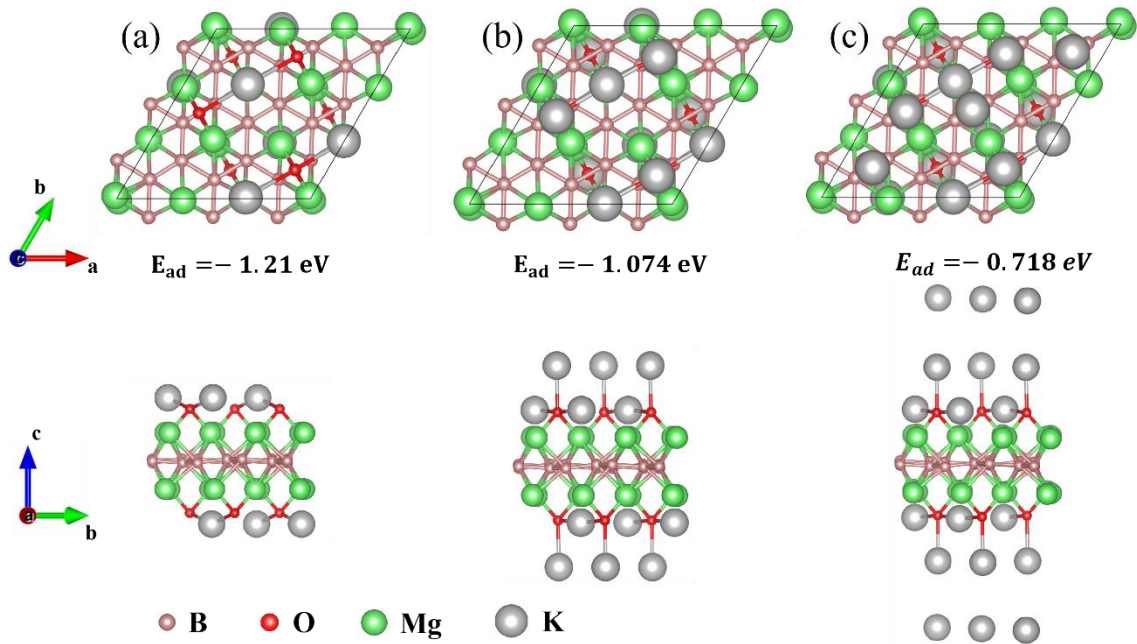

Fig. S13 (a-c) are the top view and side view after adsorption of one, two and three layers of K atoms on both sides of  $\text{Mg}_2\text{B}_3\text{O}$  monolayer, respectively.

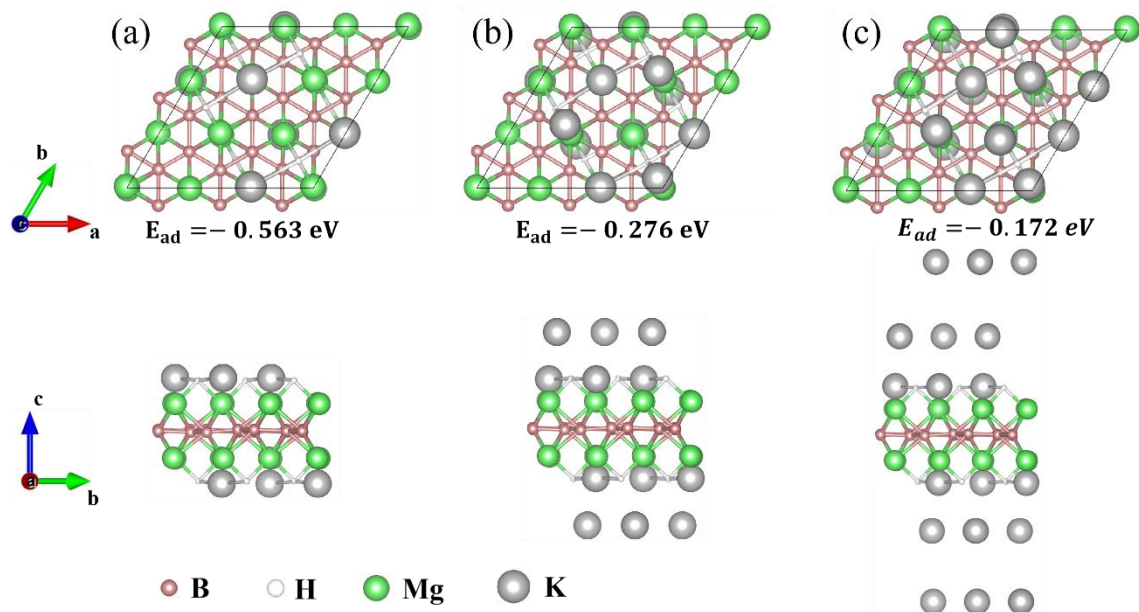

Fig. S14 (a) -(c) are the top view and side view after adsorption of one, two and three layers of K atoms on both sides of  $\text{Mg}_2\text{B}_3\text{H}$  monolayer, respectively.

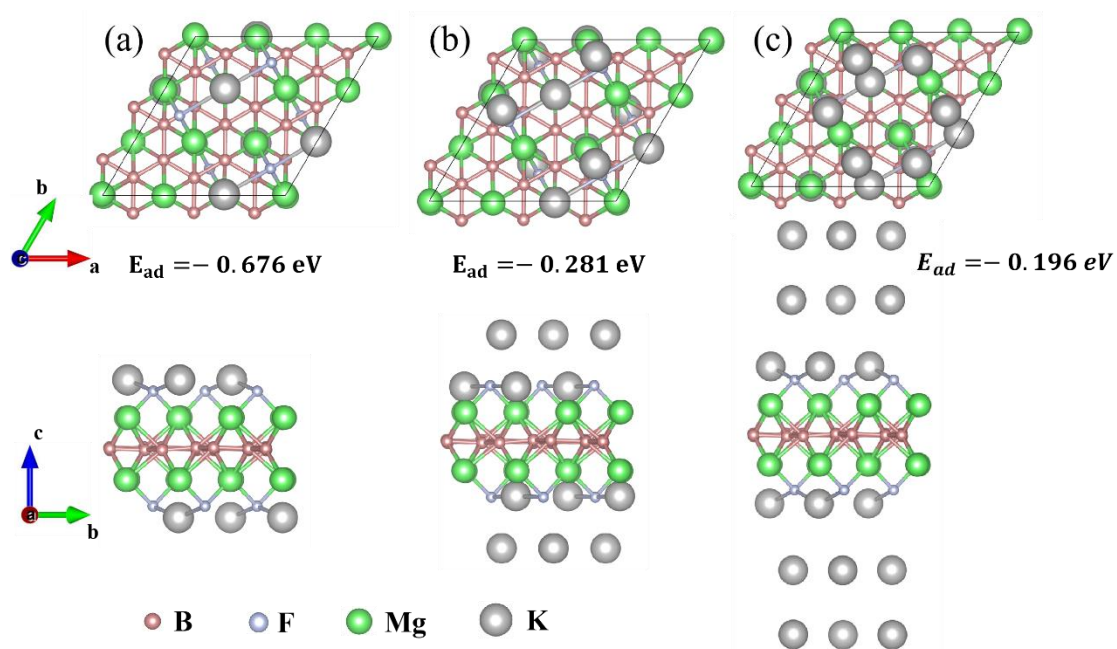

Fig. S15 (a) -(c) are the top view and side view after adsorption of one, two and three layers of K atoms on both sides of  $\text{Mg}_2\text{B}_3\text{F}$  monolayer, respectively.

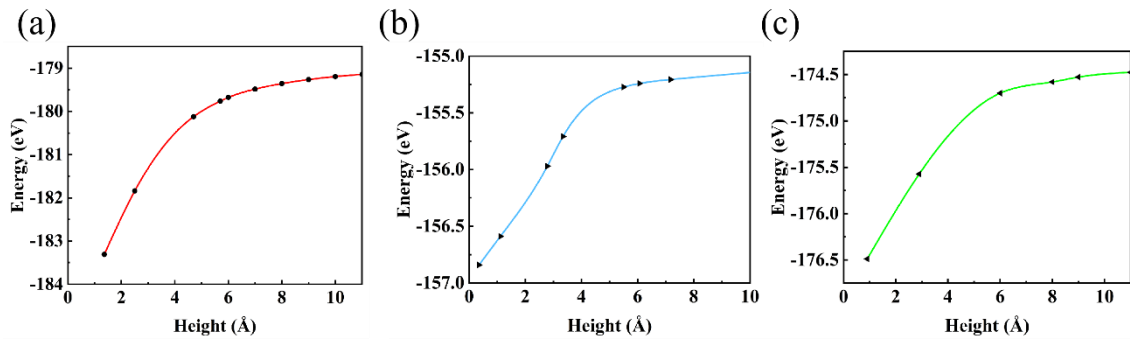

Fig. S16 Total energy of metals on (a)  $\text{Mg}_2\text{B}_3\text{O}$ , (b)  $\text{Mg}_2\text{B}_3\text{H}$  and (c)  $\text{Mg}_2\text{B}_3\text{F}$  as a function of the height from metal to  $\text{Mg}_2\text{B}_3\text{T}$  surface.

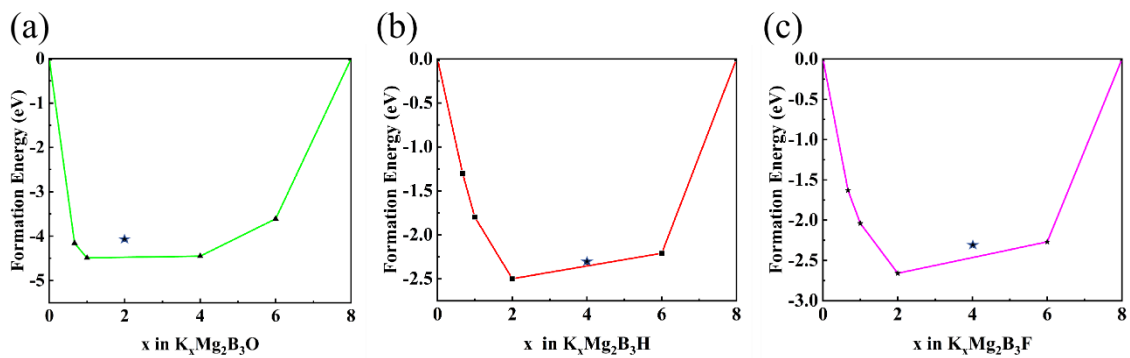

Fig. S17 The formation energies of (a)  $\text{K}_x\text{Mg}_2\text{B}_3\text{O}$ , (b)  $\text{K}_x\text{Mg}_2\text{B}_3\text{H}$  and (c)  $\text{K}_x\text{Mg}_2\text{B}_3\text{F}$ . The intermediate phase corresponding to the data points on the real line of the convex hull is thermodynamically stable.

|              | <b>B-B (Å)</b><br><b>[Mg<sub>2</sub>B<sub>3</sub>O]</b> | <b>B-B (Å)</b><br><b>[Mg<sub>2</sub>B<sub>3</sub>H]</b> | <b>B-B (Å)</b><br><b>[Mg<sub>2</sub>B<sub>3</sub>F]</b> | <b>B-B (Å)</b><br><b>[Mg<sub>2</sub>B<sub>3</sub>Cl]</b> |
|--------------|---------------------------------------------------------|---------------------------------------------------------|---------------------------------------------------------|----------------------------------------------------------|
| <b>Bond1</b> | 1.709                                                   | 1.800                                                   | 1.774                                                   | 1.792                                                    |
| <b>Bond2</b> | 1.768                                                   | 1.762                                                   | 1.762                                                   | 1.769                                                    |
| <b>Bond3</b> | 1.774                                                   | 1.771                                                   | 1.777                                                   | 1.782                                                    |
| <b>Bond4</b> | 1.769                                                   | 1.784                                                   | 1.786                                                   | 1.796                                                    |
| <b>Bond5</b> | 1.718                                                   | 1.765                                                   | 1.750                                                   | 1.772                                                    |
| <b>Bond6</b> | 1.718                                                   | 1.789                                                   | 1.798                                                   | 1.806                                                    |

Tab. S1 The lengths of each B-B bond in the boron hexagonal rings of the Mg<sub>2</sub>B<sub>3</sub>T (T=O, H, F, and Cl) monolayers.

|                                      | $C_{11}$<br><b>(GPa)</b> | $C_{12}$<br><b>(GPa)</b> | $C_{22}$<br><b>(GPa)</b> | $C_{16}$<br><b>(GPa)</b> | $C_{26}$<br><b>(GPa)</b> | $C_{66}$<br><b>(GPa)</b> |
|--------------------------------------|--------------------------|--------------------------|--------------------------|--------------------------|--------------------------|--------------------------|
| <b>Mg<sub>2</sub>B<sub>3</sub>O</b>  | 453.43                   | 118.96                   | 443.17                   | 37.34                    | -80.99                   | 54.70                    |
| <b>Mg<sub>2</sub>B<sub>3</sub>H</b>  | 546.68                   | 20.98                    | 505.11                   | -45.66                   | -19.58                   | 240.99                   |
| <b>Mg<sub>2</sub>B<sub>3</sub>F</b>  | 549.76                   | 38.90                    | 523.27                   | -6.25                    | -1.34                    | 259.38                   |
| <b>Mg<sub>2</sub>B<sub>3</sub>Cl</b> | 569.82                   | 18.34                    | 479.05                   | -28.43                   | -34.33                   | 251.63                   |

Tab. S2 Elastic constant of Mg<sub>2</sub>B<sub>3</sub>T (T=O, H, F, and Cl) monolayer.

|                           |                                       | <b>B</b> | <b>Mg</b> | <b>O</b> | <b>K</b> |
|---------------------------|---------------------------------------|----------|-----------|----------|----------|
| <b>Charge transfer(e)</b> | <b>K@Mg<sub>2</sub>B<sub>3</sub>O</b> | +7.610   | -14.689   | +7.866   | -0.787   |
|                           | <b>Mg<sub>2</sub>B<sub>3</sub>O</b>   | +4.235   | -10.166   | +5.893   |          |
|                           |                                       | <b>B</b> | <b>Mg</b> | <b>H</b> | <b>K</b> |
|                           | <b>K@Mg<sub>2</sub>B<sub>3</sub>H</b> | +8.640   | -12.990   | +3.961   | -0.610   |
|                           | <b>Mg<sub>2</sub>B<sub>3</sub>H</b>   | +5.406   | -9.897    | +3.491   |          |
|                           |                                       | <b>B</b> | <b>Mg</b> | <b>F</b> | <b>K</b> |
|                           | <b>K@Mg<sub>2</sub>B<sub>3</sub>F</b> | +8.803   | -13.670   | +5.531   | -0.632   |
|                           | <b>Mg<sub>2</sub>B<sub>3</sub>F</b>   | +5.373   | -9.872    | +4.499   |          |

Tab. S3 The charge transfer between the Mg<sub>2</sub>B<sub>3</sub>T(T=O, H and F) monolayer with and without K (where "+" indicates a gain in charge, and "-" indicates a loss of charge).

|                                     | Number of K atoms | a(Å)  | b(Å)  | Volume variation(%) |
|-------------------------------------|-------------------|-------|-------|---------------------|
| <b>Mg<sub>2</sub>B<sub>3</sub>O</b> | 0                 | 9.017 | 9.154 | 0                   |
|                                     | 6                 | 9.200 | 9.221 | 0.015               |
|                                     | 12                | 9.406 | 9.393 | 0.113               |
|                                     | 18                | 9.367 | 9.356 | 0.086               |
| <b>Mg<sub>2</sub>B<sub>3</sub>H</b> | 0                 | 9.309 | 9.262 | 0                   |
|                                     | 6                 | 9.430 | 9.448 | 0.036               |
|                                     | 12                | 9.434 | 9.454 | 0.038               |
|                                     | 18                | 9.367 | 9.391 | 0.016               |
| <b>Mg<sub>2</sub>B<sub>3</sub>F</b> | 0                 | 9.197 | 9.268 | 0                   |
|                                     | 6                 | 9.268 | 9.321 | 0.004               |
|                                     | 12                | 9.478 | 9.478 | 0.052               |
|                                     | 18                | 9.225 | 9.252 | 0                   |

Tab. S4 Changes in the in-plane lattice constants and overall volume of the Mg<sub>2</sub>B<sub>3</sub>T (T=O, H, F) monolayers after adsorbing one, two, and three layers of K atoms.

|                           |                                                 |                                                    |                                                     |                                                     |
|---------------------------|-------------------------------------------------|----------------------------------------------------|-----------------------------------------------------|-----------------------------------------------------|
|                           | Mg <sub>12</sub> B <sub>18</sub> O <sub>6</sub> | K6@Mg <sub>12</sub> B <sub>18</sub> O <sub>6</sub> | K12@Mg <sub>12</sub> B <sub>18</sub> O <sub>6</sub> | K18@Mg <sub>12</sub> B <sub>18</sub> O <sub>6</sub> |
| <b>Charge transfer(e)</b> | 0                                               | 4.598                                              | 4.3636                                              | 4.3757                                              |
|                           | Mg <sub>12</sub> B <sub>18</sub> H <sub>6</sub> | K6@Mg <sub>12</sub> B <sub>18</sub> H <sub>6</sub> | K12@Mg <sub>12</sub> B <sub>18</sub> H <sub>6</sub> | K18@Mg <sub>12</sub> B <sub>18</sub> H <sub>6</sub> |
| <b>Charge transfer(e)</b> | 0                                               | 4.295                                              | 3.714                                               | 3.5144                                              |
|                           | Mg <sub>12</sub> B <sub>18</sub> F <sub>6</sub> | K6@Mg <sub>12</sub> B <sub>18</sub> F <sub>6</sub> | K12@Mg <sub>12</sub> B <sub>18</sub> F <sub>6</sub> | K18@Mg <sub>12</sub> B <sub>18</sub> F <sub>6</sub> |
| <b>Charge transfer(e)</b> | 0                                               | 4.087                                              | 3.698                                               | 2.924                                               |

Tab. S5 Charge transfer value of Mg<sub>2</sub>B<sub>3</sub>T (T=O, H, F) monolayers after adsorption of K atoms.
